# Supplementary material
Source: publisher figshare collection journal article supplement (https://f1000.figshare.com/ndownloader/files/142954)
Supplement: Supplementary file 1 [file 142954]

Genotype	M1B/CS				Genotype	M1B/UAS-dsod1				Genotype	M1B/UAS-A4V
Date started	8/9/2008				Date started	8/9/2008				Date started	8/9/2008
Days	Vial 1	Vial 2	Vial 3		Days	Vial 1	Vial 2	Vial 3		Days	Vial 1	Vial 2	Vial 3
1	10	10	10		1	10	10	10		1	10	10	10
2	10	10	10		2	10	10	10		2	10	10	10
3	10	10	10		3	10	10	10		3	10	10	10
4	10	10	10		4	10	10	10		4	10	9	10
5	10	10	10		5	10	10	10		5	9	9	9
6	10	10	10		6	10	10	10		6	9	8	9
7	10	10	10		7	10	10	10		7	8	8	9
8	10	10	10		8	10	10	10		8	8	7	8
9	10	9	10		9	10	10	10		9	7	7	7
10	9	9	9		10	10	10	10		10	6	5	6
11	8	8	8		11	10	10	10		11	4	4	4
12	6	8	6		12	10	9	9		12	2	2	2
13	5	5	5		13	9	8	8		13	1	1	1
14	2	3	4		14	7	6	7		14	0	0	0
15	0	0	2		15	6	3	6		15	0	0	0
16	0	0	0		16	5	3	3		16	0	0	0
17	0	0	0		17	3	3	2		17	0	0	0
18	0	0	0		18	2	2	1		18	0	0	0
19	0	0	0		19	1	2	0		19	0	0	0
20	0	0	0		20	0	1	0		20	0	0	0
21	0	0	0		21	0	0	0		21	0	0	0
22	0	0	0		22					22	0	0	0
23	0	0	0		23					23	0	0	0
24	0	0	0		24					24	0	0	0
25	0	0	0		25					25	0	0	0
26	0	0	0		26					26	0	0	0
27	0	0	0		27					27	0	0	0
28	0	0	0		28					28	0	0	0
29	0	0	0		29					29	0	0	0
30	0	0	0		30					30	0	0	0
Genotype	M1B/UAS-G85R				Genotype	M1B/UAS-hSOD1
Date started	8/9/2008				Date started	8/9/2008
Days	Vial 1	Vial 2	Vial 3		Days	Vial 1	Vial 2	Vial 3
1	10	10	10		1	10	10	10
2	10	10	10		2	10	10	10
3	9	10	10		3	10	10	10
4	9	9	9		4	10	10	10
5	9	8	8		5	10	9	10
6	8	8	8		6	9	9	9
7	7	8	8		7	9	8	9
8	7	7	7		8	8	8	8
9	6	6	6		9	7	7	8
10	5	5	5		10	6	7	6
11	3	3	3		11	5	6	5
12	1	2	2		12	4	4	5
13	0	0	0		13	2	3	2
14	0	0	0		14	0	0	0
15	0	0	0		15
16	0	0	0		16
17	0	0	0		17
18	0	0	0		18
19	0	0	0		19
20	0	0	0		20
21	0	0	0		21
22	0	0	0		22
23	0	0	0		23
24	0	0	0		24
25	0	0	0		25
26	0	0	0		26
27	0	0	0		27
28	0	0	0		28
29	0	0	0		29
30	0	0	0		30
